# Supplementary material
Source: bioRxiv or medRxiv preprint supplement (https://medrxiv.org/highwire/filestream/86443/field_highwire_adjunct_files/3/2020.06.16.20133207-4.pdf)

**Appendix 4. Figure 3.** Risk of bias summary: review authors' judgements about each risk of bias item for each included study.

|                 | Random sequence generation (selection bias) | Allocation concealment (selection bias) | Blinding of participants and personnel (performance bias) | Blinding of outcome assessment (detection bias) | Incomplete outcome data (attrition bias) | Selective reporting (reporting bias) | Other bias |
|-----------------|---------------------------------------------|-----------------------------------------|-----------------------------------------------------------|-------------------------------------------------|------------------------------------------|--------------------------------------|------------|
| Aiello 2012     | +                                           | +                                       | +                                                         | +                                               | +                                        | +                                    | +          |
| Allison 2010    | +                                           | +                                       | +                                                         | +                                               | +                                        | +                                    | +          |
| Baig 2010       | +                                           | +                                       | +                                                         | ?                                               | +                                        | +                                    | ?          |
| Barasheed 2014  | ?                                           | ?                                       | +                                                         | ?                                               | +                                        | +                                    | ?          |
| Bryce 2008      | +                                           | +                                       | +                                                         | ?                                               | +                                        | +                                    | +          |
| Canini 2010     | +                                           | +                                       | +                                                         | +                                               | +                                        | +                                    | +          |
| Chan 2015       | +                                           | +                                       | +                                                         | ?                                               | +                                        | +                                    | +          |
| Chen 2016       | ?                                           | ?                                       | +                                                         | ?                                               | +                                        | +                                    | ?          |
| Chughtai 2019   | +                                           | +                                       | +                                                         | ?                                               | +                                        | +                                    | +          |
| Cowling 2008    | +                                           | +                                       | +                                                         | +                                               | +                                        | +                                    | +          |
| Cowling 2009    | +                                           | +                                       | +                                                         | ?                                               | +                                        | ?                                    | +          |
| DilLeo 2017     | +                                           | +                                       | +                                                         | +                                               | +                                        | +                                    | +          |
| Foo 2006        | +                                           | +                                       | +                                                         | ?                                               | +                                        | +                                    | ?          |
| Forgie 2009     | +                                           | +                                       | +                                                         | ?                                               | +                                        | +                                    | ?          |
| Jacobs 2009     | ?                                           | ?                                       | +                                                         | +                                               | +                                        | +                                    | ?          |
| Kao 2004        | +                                           | +                                       | +                                                         | +                                               | +                                        | +                                    | ?          |
| Larson 2010     | ?                                           | ?                                       | +                                                         | ?                                               | +                                        | ?                                    | ?          |
| Lee 2011        | +                                           | +                                       | +                                                         | +                                               | +                                        | +                                    | +          |
| Lim 2006        | +                                           | +                                       | +                                                         | ?                                               | +                                        | +                                    | ?          |
| MacIntyre 2009  | ?                                           | ?                                       | +                                                         | +                                               | +                                        | +                                    | ?          |
| MacIntyre 2011  | ?                                           | +                                       | +                                                         | +                                               | +                                        | +                                    | +          |
| MacIntyre 2013  | ?                                           | ?                                       | +                                                         | +                                               | +                                        | +                                    | ?          |
| MacIntyre 2015  | +                                           | +                                       | +                                                         | +                                               | +                                        | +                                    | +          |
| Martel 2013     | +                                           | +                                       | +                                                         | ?                                               | +                                        | +                                    | +          |
| Nickell 2004    | +                                           | +                                       | +                                                         | ?                                               | +                                        | +                                    | +          |
| Ong 2020        | +                                           | +                                       | +                                                         | ?                                               | +                                        | +                                    | +          |
| Or 2018         | +                                           | +                                       | +                                                         | +                                               | +                                        | +                                    | ?          |
| Person 2018     | ?                                           | ?                                       | ?                                                         | ?                                               | +                                        | +                                    | +          |
| Radonovich 2009 | ?                                           | ?                                       | +                                                         | +                                               | +                                        | +                                    | +          |
| Radonovich 2019 | +                                           | +                                       | +                                                         | +                                               | +                                        | +                                    | +          |
| Rebmann 2013    | ?                                           | ?                                       | +                                                         | +                                               | +                                        | +                                    | ?          |
| Roberge 2012    | ?                                           | +                                       | +                                                         | +                                               | +                                        | +                                    | +          |
| Shenal 2012     | +                                           | +                                       | +                                                         | ?                                               | +                                        | +                                    | ?          |
| Simmerman 2011  | +                                           | ?                                       | +                                                         | +                                               | +                                        | +                                    | ?          |
| Suess 2012      | +                                           | +                                       | ?                                                         | +                                               | +                                        | +                                    | +          |
| Thomas 2011     | +                                           | +                                       | +                                                         | ?                                               | +                                        | +                                    | ?          |
| Vanjak 2006     | +                                           | +                                       | ?                                                         | +                                               | +                                        | +                                    | +          |
| Wong 2013       | +                                           | +                                       | +                                                         | +                                               | +                                        | +                                    | +          |
| Yeung 2020      | ?                                           | +                                       | +                                                         | +                                               | +                                        | +                                    | +          |

**Appendix 4. Figure 4.** Analysis with studies rated at high risk of bias in more than 2 domains excluded

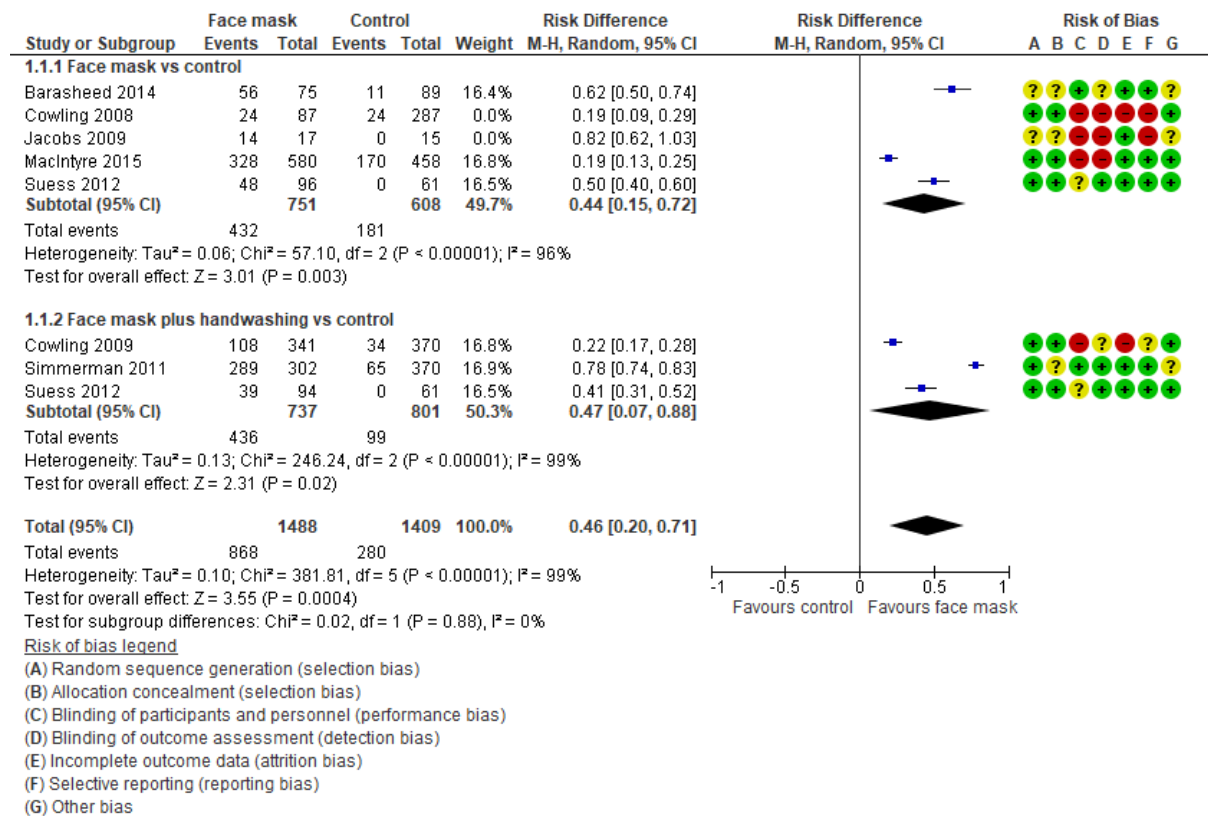

**Appendix 4. Figure 5.** Analysis with studies sub-grouped by setting (community setting, hospital setting)

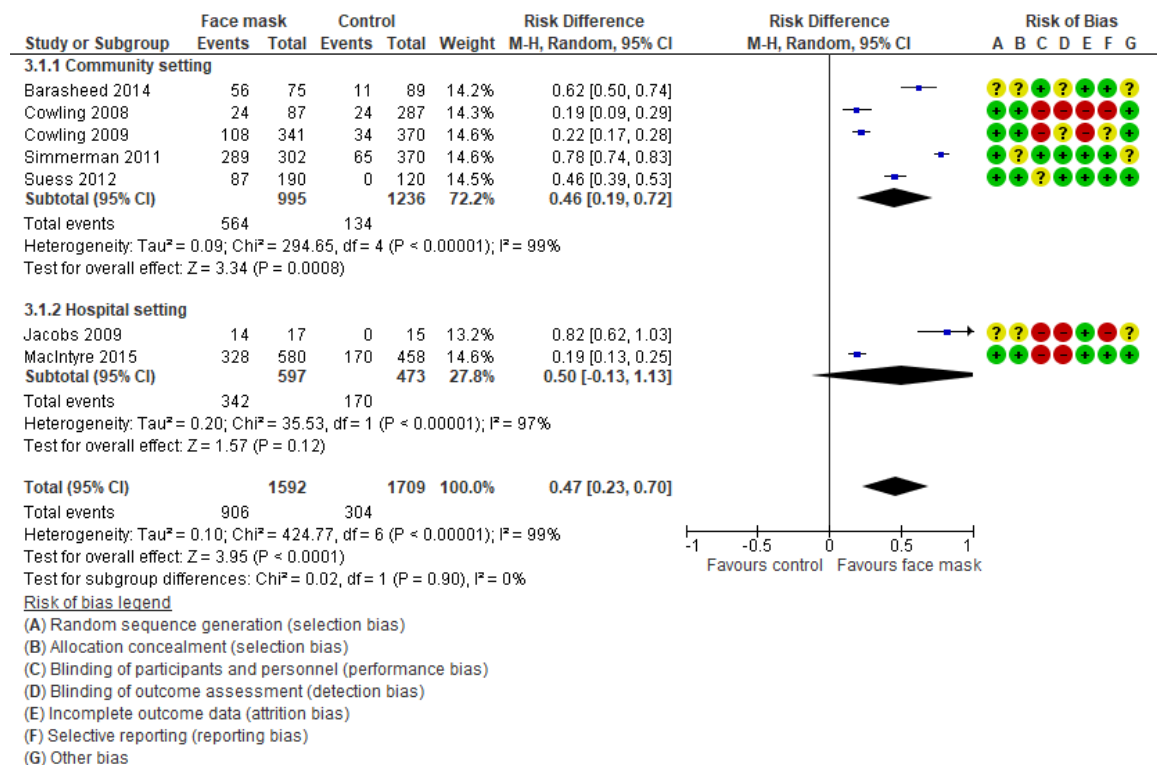

Supplement: Supplementary file [file 2020.06.16.20133207-4.pdf]
